# Supplementary material for: Characterization of antimicrobial resistance genes in Haemophilus parasuis isolated from pigs in China
Source: PeerJ. 2018 Apr 9;6:e4613. doi: 10.7717/peerj.4613 (PMC5896491; doi:10.7717/peerj.4613)
Supplement: Supplemental Information 1 [file peerj-06-4613-s001.xlsx]

## Sheet: 工作表1
Strain	MICs (μg/mL)
	Nalidixic acid	Lomefloxacin	Enrofloxacin	Levofloxacin	Norfloxacin	Ciprofloxacin
HP001	128	1	2	0.25	1	2
HP002	64	4	0.5	0.25	0.5	0.25
HP003	0.25	1	0.25	<0.25	0.5	<0.25
HP004	128	1	0.5	0.25	2	8
HP005	128	2	8	64	1	1
HP006	64	1	2	0.25	0.25	0.5
HP007	256	4	2	0.25	1	2
HP008	128	16	32	2	>512	4
HP009	64	4	16	0.25	16	16
HP010	64	4	16	1	0.5	4
HP011	512	1	1	0.5	0.5	0.5
HP012	128	4	8	2	>512	2
HP013	256	64	2	4	64	8
HP014	256	2	2	0.25	0.5	2
HP015	256	16	16	4	>512	8
HP016	512	64	16	8	>512	16
HP017	64	8	4	0.25	2	8
HP018	256	0.5	0.5	0.25	0.25	1
HP019	256	32	16	4	64	16
HP020	16	8	8	0.25	8	32
HP021	0.25	<0.25	<0.25	0.25	0.25	0.25
HP022	128	1	1	256	2	8
HP023	256	32	8	2	32	8
HP024	16	0.5	1	64	2	4
HP025	256	16	4	2	8	4
HP026	64	4	4	0.25	1	4
HP027	64	2	2	8	4	4
HP028	128	<0.25	0.5	0.25	0.5	4
HP029	256	16	2	4	32	8
HP030	64	1	0.5	<0.25	0.5	1
HP031	4	16	16	4	64	1
HP032	128	0.25	0.25	0.25	0.25	0.5
HP033	64	0.25	<0.25	16	256	1
HP034	64	<0.25	0.25	0.25	0.25	0.25
HP035	32	4	8	64	0.5	4
HP036	128	128	8	16	32	32
HP037	32	8	2	0.5	4	2
HP038	32	1	1	8	8	16
HP039	16	64	32	8	>512	16
HP040	64	8	8	0.25	16	16
HP041	32	<0.25	<0.25	0.25	0.25	1
HP042	8	1	1	8	1	1
HP043	128	0.5	<0.25	0.25	0.25	0.5
HP044	64	0.5	0.5	0.25	0.5	1
HP045	64	1	1	0.25	8	8
HP046	128	1	2	0.25	2	8
HP047	32	<0.25	<0.25	0.25	0.25	1
HP048	64	16	4	4	16	8
HP049	64	4	2	2	8	4
HP050	256	0.5	0.25	0.25	2	2
HP051	64	2	2	0.25	1	0.25
HP052	256	2	2	1	2	1
HP053	64	0.5	2	0.25	0.25	0.25
HP054	64	4	4	0.25	0.25	0.25
HP055	32	1	1	0.25	32	16
HP056	32	1	1	8	1	1
HP057	128	1	1	0.25	0.5	2
HP058	64	1	1	0.25	2	1
HP059	125	8	32	0.25	0.25	0.5
HP060	32	<0.25	<0.25	0.25	0.25	0.25
HP061	0.25	<0.25	<0.25	0.25	0.25	0.25
HP062	64	2	0.5	1	2	1
HP063	128	0.25	<0.25	0.25	0.25	0.25
HP064	>512	32	32	32	>512	>512
HP065	256	4	4	0.25	0.25	0.25
HP066	128	4	4	0.25	2	8
HP067	64	2	0.5	0.5	2	0.5
HP068	128	0.5	1	0.5	0.5	0.5
HP069	64	32	4	2	16	16
HP070	128	1	2	0.25	4	2
HP071	128	2	1	64	2	8
HP072	32	<0.25	<0.25	0.25	4	8
HP073	128	<0.25	<0.25	16	0.25	0.25
HP074	128	1	1	<0.25	1	<0.25
HP075	128	1	4	0.5	8	0.25
HP076	1	1	1	0.25	0.25	1
HP077	128	4	8	0.25	2	16
HP078	64	2	4	0.25	0.25	1
HP079	>512	16	16	128	8	8
HP080	1	1	1	32	1	1
HP081	0.25	<0.25	0.5	0.25	0.25	0.25
HP082	128	0.5	0.5	0.5	0.5	0.5
HP083	64	1	1	1	1	0.5
HP084	128	2	1	0.25	4	8
HP085	64	0.5	0.25	0.25	0.25	0.25
HP086	128	2	1	0.25	1	2
HP087	128	4	4	0.25	0.25	4
HP088	16	0.5	0.5	0.5	1	0.5
HP089	128	1	4	0.25	2	8
HP090	256	16	16	0.25	2	1
HP091	256	8	16	2	8	2
HP092	512	1	1	0.25	1	1
HP093	128	2	8	0.25	2	8
HP094	256	2	2	32	4	8
HP095	128	128	8	4	2	4
HP096	64	1	0.5	0.5	0.5	0.5
HP097	64	16	8	32	2	8
HP098	16	1	0.5	0.25	0.25	1
HP099	>512	8	8	1	16	2
HP100	32	4	4	0.25	0.5	2
HP101	256	0.5	0.5	0.5	0.5	0.25
HP102	64	4	8	8	2	4
HP103	128	64	32	32	64	32
HP104	64	1	1	0.25	2	8
HP105	512	8	16	0.25	16	32
HP106	128	1	2	0.25	0.5	8
HP107	128	2	2	0.5	2	1
HP108	128	64	16	32	128	64
HP109	32	1	1	2	16	4
HP110	512	16	1	8	32	4
HP111	64	1	2	0.25	2	2
HP112	128	64	8	4	>256	2
HP113	>256	16	4	1	8	0.5
HP114	256	32	8	4	32	8
HP115	1	1	0.5	0.5	0.5	0.5
HP116	256	1	2	1	4	16
HP117	64	4	8	0.25	2	2
HP118	128	1	1	0.25	2	4
HP119	128	8	4	2	8	4
HP120	1	0.5	0.5	0.5	0.5	0.5
HP121	64	2	0.5	0.5	2	0.5
HP122	64	8	2	1	16	2
HP123	2	1	2	8	2	2
HP124	1	0.5	0.5	0.5	0.5	0.5
HP125	256	8	4	4	2	4
HP126	0.5	0.5	0.5	0.5	0.5	0.5
HP127	1	0.5	0.5	0.5	0.5	0.5
HP128	1	0.5	0.5	0.5	0.5	0.5
HP129	4	1	0.5	32	1	1
HP130	32	4	4	0.25	2	2
HP131	64	16	2	2	32	4
HP132	64	0.5	0.5	0.25	0.5	0.25
HP133	64	32	4	2	32	8
HP134	>512	64	2	8	>512	16
HP135	16	8	8	0.25	0.5	0.5
HP136	256	1	32	0.5	>512	0.5
HP137	1	0.5	0.5	0.5	0.5	0.5
HP138	1	0.5	0.5	0.5	0.5	0.5
HP139	128	8	2	1	4	2
HP140	128	2	8	2	16	1
HP141	128	16	4	8	4	2
HP142	256	64	32	64	8	16
HP143	128	2	8	32	1	1
MIC50	128	2	2	0.5	2	4
MIC90	256	32	16	32	64	32
Resistance (%)	82.52	28.67	55.94	20.28	22.38	23.78
